# Supplementary material
Source: Springer Nature journal article supplement (https://www.springermedizin.de/resource/supplementary/12891_2009_637_MOESM4_ESM.pdf/9506434)

**A**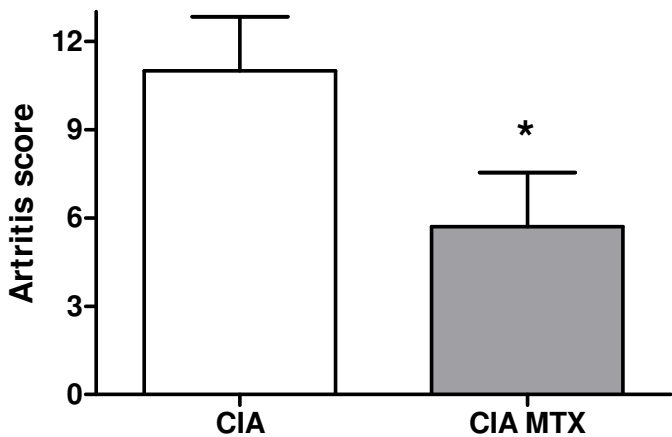**B**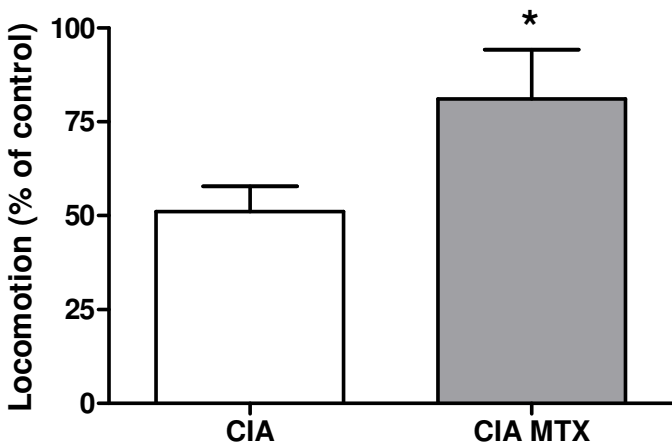

Supplement: MOESM4 [file 9506434]
